# Supplementary material for: Circulating eNAMPT as a Diagnostic Biomarker in the Critically Ill: Acute Pancreatitis, Sepsis, Trauma, and Acute Respiratory Distress Syndrome
Source: Research Square preprint supplement (doi:10.21203/rs.3.rs-847354/v1), 2021-08-31
Supplement: Supplementary file 1 [file 7ec669057e80334d8bb2e98f.docx]

| **Sepsis Cohort** | | | | |
| --- | --- | --- | --- | --- |
| eNAMPT value | Statistical Test | Estimate | Lower limit | Upper limit |
| 33.8 ng/ml | Sensitivity | 0.87 | 0.77 | 0.94 |
|  | Specificity | 0.79 | 0.71 | 0.86 |
|  | NPV | 0.92 | 0.85 | 0.95 |
|  | PPV | 0.70 | 0.62 | 0.77 |
| 41.4 ng/ml | Sensitivity | 0.99 | 0.92 | 1.0 |
|  | Specificity | 0.63 | 0.54 | 0.72 |
|  | NPV | 0.99 | 0.92 | 1.0 |
|  | PPV | 0.61 | 0.55 | 0.66 |
| 50.6 ng/ml | Sensitivity | 0.99 | 0.92 | 1.0 |
|  | Specificity | 0.50 | 0.41 | 0.60 |
|  | NPV | 0.98 | 0.90 | 1.0 |
|  | PPV | 0.53 | 0.49 | 0.58 |
| 62 ng/ml | Sensitivity | 0.99 | 0.92 | 1.0 |
|  | Specificity | 0.38 | 0.30 | 0.47 |
|  | NPV | 0.98 | 0.87 | 1.0 |
|  | PPV | 0.48 | 0.44 | 0.51 |
| 27.6 ng/ml | Sensitivity | 0.76 | 0.64 | 0.85 |
|  | Specificity | 0.83 | 0.75 | 0.89 |
|  | NPV | 0.86 | 0.80 | 0.90 |
|  | PPV | 0.72 | 0.63 | 0.79 |
